# Supplementary figures and images for: Design and Construction of a Synthetic Nanobody Library: Testing Its Potential with a Single Selection Round Strategy
Source: MDPI journal article supplement (doi:10.3390/molecules28093708), 2023-04-25

Figure S1. Map of the designed pMAC phagemid vector.

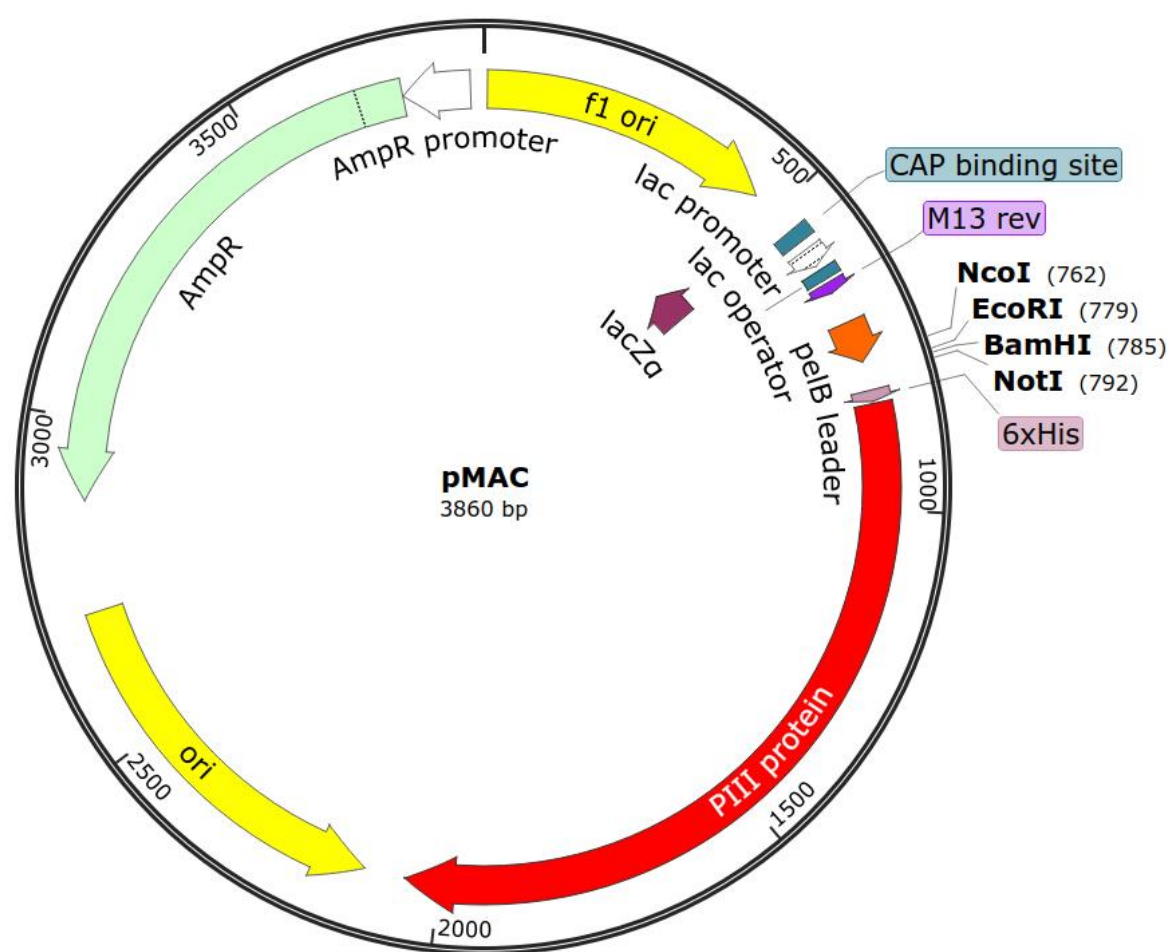

Supplement: s1 [file s1]
